# Supplementary material for: A Comparative XPS, UV PES, NEXAFS, and DFT Study of the Electronic Structure of the Salen Ligand in the H2(Salen) Molecule and the [Ni(Salen)] Complex
Source: MDPI journal article supplement (doi:10.3390/ijms24129868), 2023-06-07
Supplement: s1 [file s1]

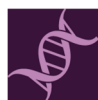

Supplementary information

# A Comparative XPS, UV PES, NEXAFS and DFT study of the electronic structure of the Salen ligand in the H<sub>2</sub>(Salen) molecule and the [Ni(Salen)] complex

Petr M. Korusenko <sup>1</sup>, Olga V. Petrova <sup>1,2</sup>, Anatoliy A. Vereshchagin <sup>3</sup>, Konstantin P. Katin <sup>4</sup>, Oleg V. Levin <sup>3</sup>, Sergey V. Nekipelov <sup>2</sup>, Danil V. Sivkov <sup>1,2</sup>, Victor N. Sivkov <sup>2</sup> and Alexander S. Vinogradov <sup>1,\*</sup>

<sup>1</sup> Department of Solid State Electronics, V.A. Fock Institute of Physics, St. Petersburg State University, 7/9 Universitetskaya nab., 199034, Saint Petersburg, Russia; teiou@mail.ru (O.V.P.); danjorno@yandex.ru (D.V.S.); p.korusenko@spbu.ru (P.M.K.)

<sup>2</sup> Institute of Physics and Mathematics, Komi Science Centre, Ural Branch of the Russian Academy of Sciences, 167982, Syktyvkar, Russia; nekipelovsv@mail.ru (S.V.N.); sivkovvn@mail.ru (V.N.S.)

<sup>3</sup> Department of Electrochemistry, Institute of Chemistry, St. Petersburg State University, 7/9 Universitetskaya nab., 199034, Saint Petersburg, Russia; anatoliy\_ve@mail.ru (A.A.V.); o.levin@spbu.ru (O.V.L.)

<sup>4</sup> Department of Condensed Matter Physics, National Research Nuclear University “MEPhI”, Kashirskoe Sh. 31, 115409, Moscow, Russia

\* Correspondence: asvinograd@yahoo.de

As can be seen from Figure S1, all presented survey spectra of the metal-free H<sub>2</sub>(Salen) molecule and the [Ni(Salen)] complex do not show any peaks from substrate elements or contaminant inclusions. Therefore, it can be stated that the sample layers prepared by evaporation and deposition on the Pt foil are of high purity.

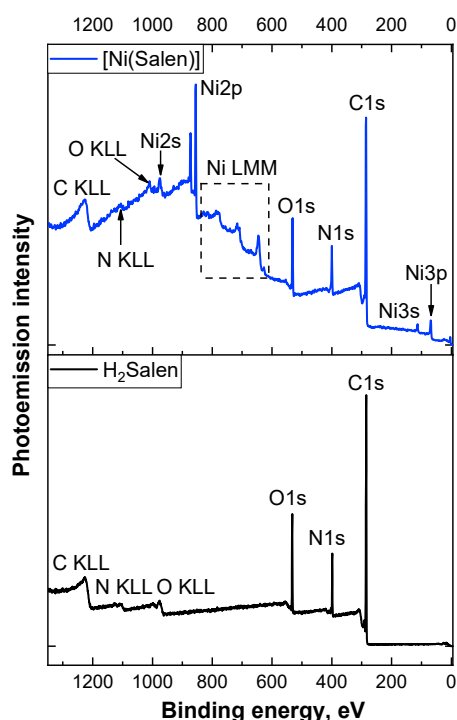

**Figure S1.** Overview PE spectra from the metal-free H<sub>2</sub>Salen and [Ni(Salen)] complex deposited onto Pt foil were measured using ESCALAB 250 Xi electron spectrometer with Al K $\alpha$  radiation ( $h\nu$  = 1486.6 eV).

**Table S1.** Fitting parameters for C 1s PE spectra of H<sub>2</sub>(Salen) and [Ni(Salen)].

| Experiment             |             |                        |          |                         |                          |
|------------------------|-------------|------------------------|----------|-------------------------|--------------------------|
| Substance              | PE band     | $E_{\text{bind}}$ , eV | FWHM, eV | Relative peak intensity | Relative total intensity |
| H <sub>2</sub> (Salen) | C $\alpha$  | 284.78                 | 1.09     | 1.0                     | 1.0                      |
|                        | C $\beta$   | 286.16                 | 1.25     | 0.47                    | 0.52                     |
| [Ni(Salen)]            | C $\alpha$  | 285.77                 | 0.97     | 1.0                     | 1.0                      |
|                        | C $\beta$   | 287.24                 | 0.97     | 0.63                    | 0.63                     |
| Calculation            |             |                        |          |                         |                          |
| Substance              | PE band     | $E_{\text{bind}}$ , eV | FWHM, eV | Relative peak intensity | Relative total intensity |
| H <sub>2</sub> (Salen) | C $\alpha$  | 284.81                 | 1.10     | 1.0                     | 1.0                      |
|                        | C $\beta$ 1 | 285.59                 | 1.0      | 0.165                   | 0.165                    |
|                        | C $\beta$ 2 | 286.53                 | 1.0      | 0.165                   | 0.165                    |
| [Ni(Salen)]            | C $\alpha$  | 285.78                 | 0.97     | 1.0                     | 1.0                      |
|                        | C $\beta$   | 287.49                 | 0.97     | 0.60                    | 0.60                     |

**Table S2.** Calculated C 1s binding energies  $E_{\text{bind}}$  (in eV)\* for different carbon atoms in the H<sub>2</sub>(Salen) molecule and the [Ni(Salen)] complex.

| Atom<br>Substance      |                   | C1<br>(8)     | C2<br>(2)<br>-N | C3<br>(2)<br>-N | C4<br>(2) | C5<br>(2)<br>-O |
|------------------------|-------------------|---------------|-----------------|-----------------|-----------|-----------------|
| H <sub>2</sub> (Salen) | $E_{\text{bind}}$ | 284.53—284.87 | 284.92          | 285.50          | 284.86    | 286.54          |
| [Ni(Salen)]            | $E_{\text{bind}}$ | 285.38—286.03 | 287.33          | 287.71          | 285.84    | 287.44          |

\* The calculated C1s binding energies  $E_{\text{bind}}$  are indicated taking into account the energy shifts of 5.64 eV and 6.86 eV for H<sub>2</sub>(Salen) and [Ni(Salen)], respectively, to ensure the energy matching of the C $\alpha$  bands in the calculated and experimental C1s PE spectra.

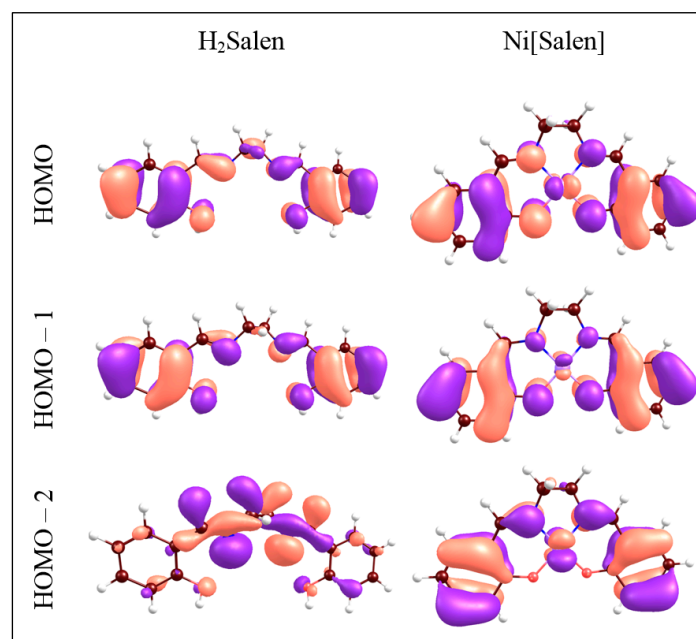**Figure S2.** Higher occupied molecular orbitals of H<sub>2</sub>(Salen) and [Ni(Salen)].

**Table S3.** Optimized Cartesian atomic coordinates (angstroms) of free Salen and [Ni(Salen)] complex.

| H <sub>2</sub> (Salen) |          |          |          | [Ni(Salen)] |          |          |          |
|------------------------|----------|----------|----------|-------------|----------|----------|----------|
| Atom                   | x        | y        | z        | Atom        | x        | y        | z        |
| C                      | 4.65588  | −0.21927 | −0.16965 | Ni          | 1.1774   | −2.03015 | 6.3E−4   |
| C                      | −2.31653 | −3.80039 | 0.1927   | C           | 4.08562  | −0.50511 | 0.15779  |
| C                      | 5.25018  | −1.48792 | 0.01994  | C           | −1.75584 | −3.50347 | −0.15746 |
| C                      | −1.64312 | −5.02413 | −0.02461 | C           | 4.03458  | −1.93944 | 0.13494  |
| C                      | 3.21225  | 0.03233  | −0.30943 | C           | −0.56075 | −4.29825 | −0.13577 |
| C                      | −1.66716 | −2.49761 | 0.41145  | C           | 2.89726  | 0.2611   | 0.01317  |
| C                      | 0.9276   | −0.36181 | −0.45957 | C           | −1.68541 | −2.09141 | −0.01001 |
| C                      | −0.0025  | −0.89483 | 0.64679  | C           | 0.55957  | 0.67078  | −0.33441 |
| C                      | −3.72084 | −3.82299 | 0.20277  | C           | −0.65548 | 0.04681  | 0.33857  |
| C                      | 5.50673  | 0.89671  | −0.22374 | C           | −3.02257 | −4.12641 | −0.29615 |
| C                      | −2.37846 | −6.19789 | −0.22188 | C           | 5.33055  | 0.16107  | 0.29233  |
| C                      | 6.63941  | −1.5937  | 0.14713  | C           | −0.71909 | −5.71026 | −0.25246 |
| C                      | 6.88671  | 0.79244  | −0.09946 | C           | 5.27472  | −2.6337  | 0.24684  |
| C                      | −4.45194 | −4.98807 | 0.00642  | C           | 6.50754  | −0.54013 | 0.40646  |
| C                      | 7.45313  | −0.46715 | 0.08824  | C           | −3.13836 | −5.49113 | −0.4158  |
| C                      | −3.76921 | −6.1841  | −0.20778 | C           | 6.46341  | −1.95302 | 0.38039  |
| N                      | −0.41952 | −2.26329 | 0.40866  | C           | −1.96471 | −6.27896 | −0.39057 |
| N                      | 2.28946  | −0.83916 | −0.31404 | N           | −0.59333 | −1.39548 | 0.07978  |
| O                      | 4.45636  | −2.58622 | 0.0781   | N           | 1.69521  | −0.22074 | −0.07603 |
| O                      | −0.28658 | −5.039   | −0.03542 | O           | 2.94679  | −2.62321 | 0.01242  |
| H                      | 2.97234  | 1.10552  | −0.41779 | O           | 0.6289   | −3.81314 | −0.01065 |
| H                      | −2.39115 | −1.68166 | 0.58861  | H           | 3.01213  | 1.34695  | −0.03731 |
| H                      | 0.54388  | −0.70901 | −1.42554 | H           | −2.63464 | −1.5521  | 0.04151  |
| H                      | −0.86654 | −0.2126  | 0.73439  | H           | 0.39424  | 0.72249  | −1.41685 |
| H                      | 0.87752  | 0.74128  | −0.45501 | H           | −1.59006 | 0.48082  | −0.03166 |
| H                      | 0.54429  | −0.86414 | 1.59588  | H           | 0.75182  | 1.68345  | 0.0351   |
| H                      | −4.24284 | −2.88612 | 0.37037  | H           | −0.60054 | 0.21281  | 1.42087  |
| H                      | 5.05555  | 1.87338  | −0.36853 | H           | −3.91002 | −3.49993 | −0.30656 |
| H                      | −1.84644 | −7.13103 | −0.38729 | H           | 5.33842  | 1.24732  | 0.30308  |
| H                      | 7.08134  | −2.57573 | 0.29379  | H           | 0.18056  | −6.31343 | −0.23207 |
| H                      | 7.51026  | 1.67701  | −0.14744 | H           | 5.24024  | −3.71628 | 0.22589  |
| H                      | −5.53493 | −4.96513 | 0.02035  | H           | 7.45346  | −0.0231  | 0.51094  |
| H                      | 8.52708  | −0.57738 | 0.18943  | H           | −4.10964 | −5.95798 | −0.52396 |
| H                      | −4.31445 | −7.10836 | −0.36332 | H           | 7.38816  | −2.51477 | 0.46697  |
| H                      | 0.01839  | −5.93813 | −0.20292 | H           | −2.04674 | −7.35751 | −0.48126 |
| H                      | 5.00499  | −3.36619 | 0.22037  |             |          |          |          |
